# Supplementary material
Source: PubMed Central journal article supplement (PMC31091)
Supplement: pnas_96_15_8365__2.pdf [file pnas_96_15_8365__2.pdf]

## Appendix B. Derivation of Formula 5.2.1

Given assumptions B.4 of the text, Eq. 5.1.3 becomes

$$\delta^{(n)}\Delta\langle V_c \rangle = \frac{a^2}{4\pi^2\epsilon_{sc}} \int_{\text{MIR}} d\omega \operatorname{Im} \{ \eta(\omega) K_o(\omega) J_n(\omega) \}, \quad [\text{B.1}]$$

where

$$J_n(\omega) \equiv \int_0^\infty q^2 dq \left\{ n^{-1} \sum_{i=1}^n \frac{f_i(q)}{(1 + qf_i(q)K_o(\omega/\epsilon_{sc})^2)} \right\}. \quad [\text{B.2}]$$

Let us suppose that the  $i$ th acoustic eigenvalue (see section 5.1) tends to  $\alpha_i qd$  for  $qd \ll 1$  ( $i = 1, \dots, n-1$ ). To evaluate expression B.2, we invoke assumption B.7 of the text and assume that  $n$  is not too large; then, the inequality  $|K_o(\omega)| \gg nd\epsilon_{sc}$  is fulfilled for most of the relevant range of  $\omega$ . This allows us to split the integral in Eq. B.2 into two parts,  $J_1$  and  $J_2$ , corresponding to  $0 \leq q \leq q_c$  and  $q_c \leq q \leq \infty$ , where we choose the cutoff  $q_c$  so that  $nq_c d \ll 1$  but  $q_c^2 |K_o| d / \epsilon_{sc} \gg 1$ , and to approximate the  $i$ th term in the integrand of  $J_1$  by  $n^{-1} \alpha_i d q^3 / (1 + \alpha_i d q^2 K_o(\omega) / \epsilon_{sc})^2$  ( $i = 1 \dots n-1$ ) and in the integrand of  $J_2$  by  $\epsilon_{sc}^{-2} K_o^{-2} \{ n^{-1} f_i^{-1}(q) \}$  ( $i = 1 \dots n$ ). The single optical term ( $i = n$ ) contributes to  $J_1$  only a term of relative order  $q_c d$ , which may consistently be neglected (through compare section 6).

The crucial observation, now, is that<sup>†</sup>

$$n^{-1} \sum_{j=1}^n f_j^{-1}(q) - 1 = 2 \left( 1 - \frac{1}{n} \right) (\exp(2qd) - 1)^{-1}, \quad [\text{B.3}]$$

from which it follows, taking the limit  $q \rightarrow 0$ , that  $\sum_{i=1}^{n-1} \alpha_i^{-1} = n-1$ . Explicit evaluation of  $J_1$  and  $J_2$  using Eq. B.3 then leads to the result (to within terms of relative order  $\zeta^{-1} \equiv \epsilon_{sc} d / |K|$ )

$$J_n(\omega) = \left( 1 - \frac{1}{n} \right) \frac{\epsilon_{sc}^2}{2dK_o^2(\omega)} \{ \ln(K_o(\omega)/4e^{1/2}d\epsilon_{sc}) - \beta_n \}, \quad [\text{B.4}]$$

where

$$\beta_n \equiv \frac{1}{2} (n-1) \sum_{i=1}^{n-1} \alpha_i^{-1} \ln \alpha_i \quad [\text{B.5}]$$

The term  $\beta_n$  is numerically small ( $\beta_n = 0, 0.13, 0.18 \dots 0.3, \dots$  for  $n = 2, 3, 4 \dots \infty$ ). If we neglect it, we immediately obtain from Eq. B.4 formula 5.2.1 of the text.

---

<sup>†</sup>It is straightforward to prove Eq. B.3 case by case for  $n \leq 6$  and  $n = \infty$ . I am indebted to Misha Turlakov for a proof in the general case.
